# Supplementary material for: Specific attributes of the VL domain influence both the structure and structural variability of CDR-H3 through steric effects
Source: PubMed Central journal article supplement (PMC10410447; doi:10.3389/fimmu.2023.1223802), 2023-07-26
Supplement: DataSheet_1.pdf [file DataSheet_1.pdf]

## Supplementary Material

### 1 SUPPLEMENTARY FIGURES

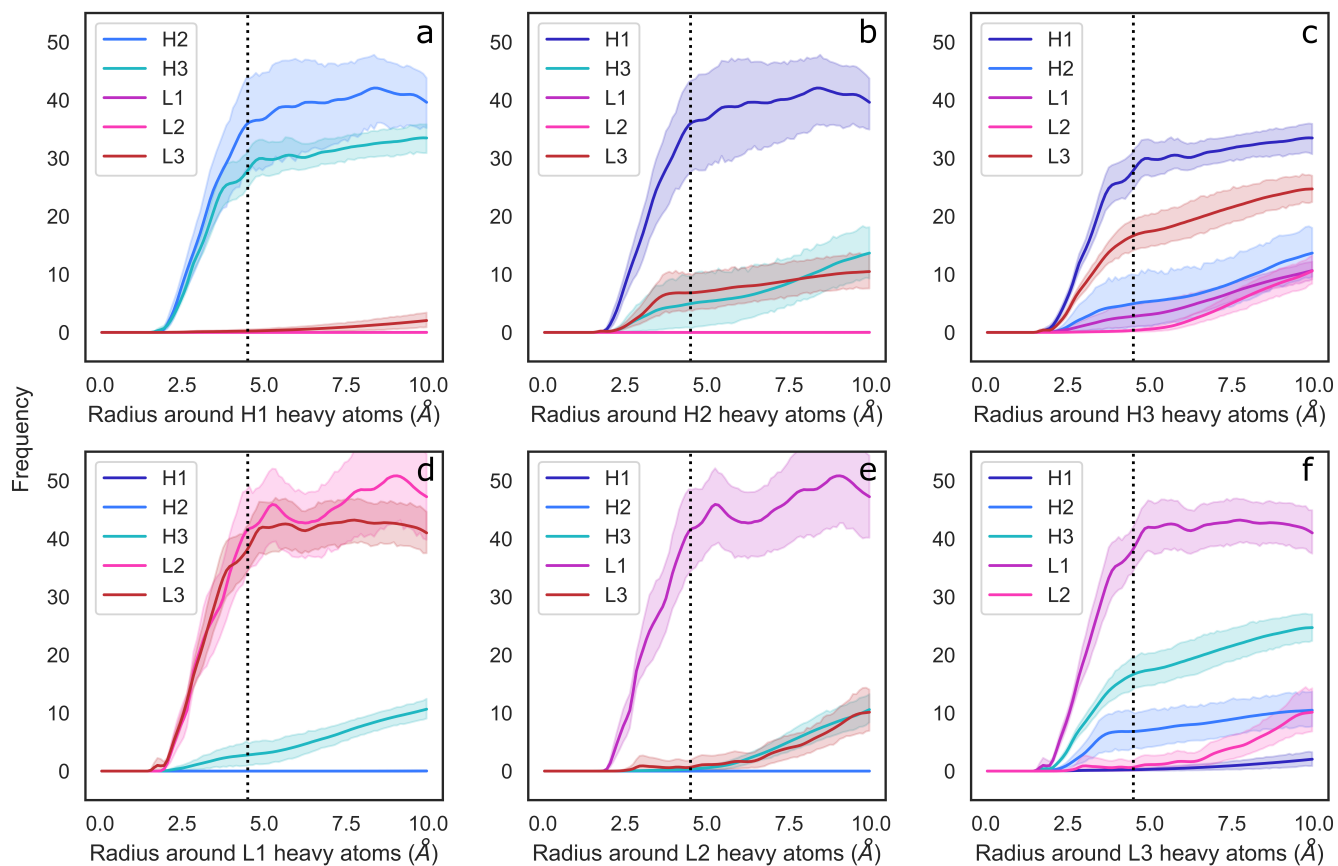

**Figure S1.** Radial distribution functions of CDR loops in the molecular dynamics data set, calculated RDFs using the mdtraj implementation using a bin width of 0.1 Å. Shaded areas correspond to 95% confidence intervals.

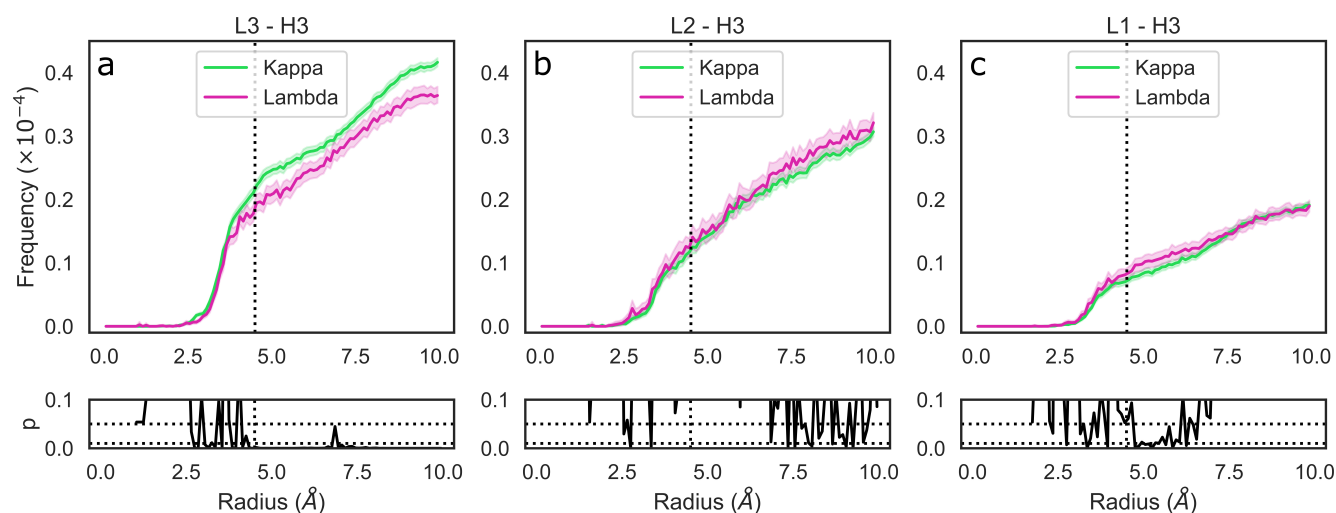

**Figure S2.** Radial distribution functions of CDR loops in the crystal data set separated by light chain type. e generated histograms for all pairwise CDR loop heavy atom distances using a bin width of 0.1 Å. Each bin was then normalised by dividing by the product of the volume of a spherical shell centered at 0 and located on the edges of the bin and the number of possible pairs of heavy atoms. Shaded areas are 95% confidence intervals. p-values are calculated for each bin using a t-test.
